# Supplementary material for: Food Intake and Core Body Temperature of Pups and Adults in adbMouse Line Deficient in the Long Form of the Leptin Receptor withoutMistyMutation
Source: Hindawi journal article supplement (doi:10.1155/2018/9670871), 2018-12-03
Supplement: f1 [file 9670871.f1.pdf]

Supplementary **FIGURE 1:**

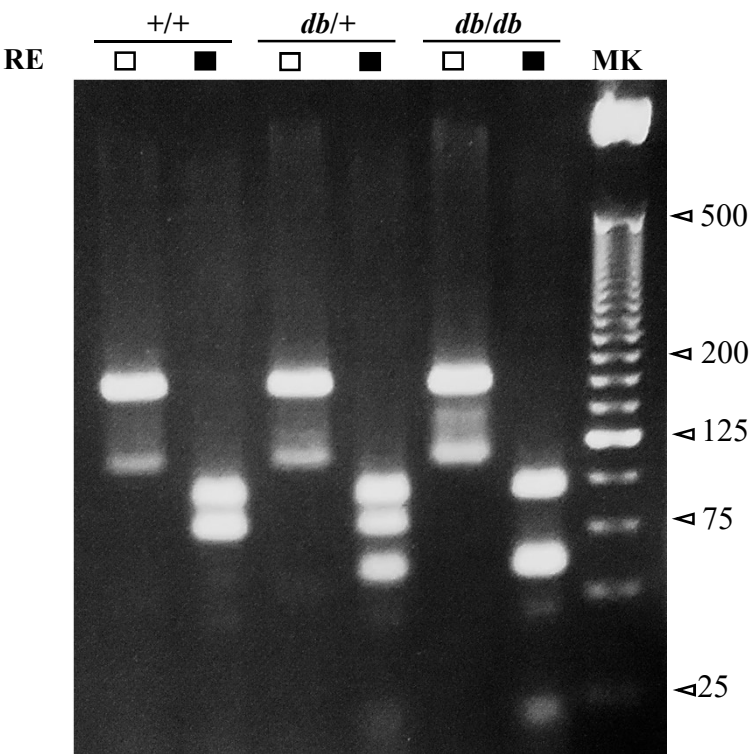

(a)

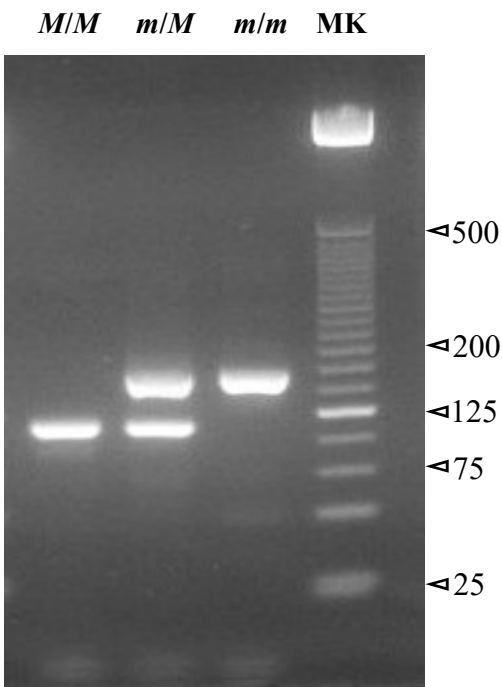

(b)

**Supplementary TABLE 1: Primer sequences for genetic diagnosis and real-time PCR.**

| Gene                                 | Accession number | Sequence                                                                                             |
|--------------------------------------|------------------|------------------------------------------------------------------------------------------------------|
| Genes targeted for genetic diagnosis |                  |                                                                                                      |
| <i>Lepr</i>                          | NC_000070        | F: 5'-AGAACGGACACTCTTTGAAG-3'<br>R: 5'-TCTAATAAGCTCATCAAATGTTA-3'                                    |
| <i>Dock7</i>                         | NC_000070        | F: 5'-CTGTCCACATAATGATTTCAATA-3'<br>R1: 5'-CTGGCAGGCAGAACTGCC-3'<br>R2: 5'-CAATCGCAAACGCATTAGTAAA-3' |
| Genes targeted for real-time PCR     |                  |                                                                                                      |
| <i>Gapdh</i>                         | NM_008084        | F: 5'-CCGCATCTTCTTGTGCAGTGCC-3'<br>R: 5'-GGGGTCGTTGATGGCAACAATCTC-3'                                 |
| <i>Agrp</i>                          | NM_007427        | F: 5'-GAGTTCCCAGGTCTAAGTCTGAATG-3'<br>R: 5'-ATCTAGCACCTCCGCCAAAG-3'                                  |
| <i>Cart</i>                          | NM_013732        | F: 5'-ACGAGAAGAAGTACGGCCAA-3'<br>R: 5'-CCCGATCCTGGCCCCCTTT-3'                                        |
| <i>Npy</i>                           | NM_023456        | F: 5'-TCATCACCAGACAGAGATATG-3'<br>R: 5'-GTGCTTTCCTTCATTAAGAGG-3'                                     |
| <i>Pomc</i>                          | NM_008895        | F: 5'-CTGCTTCAGACCTCCATAGA-3'<br>R: 5'-GGATGCAAGCCAGCAGGTT-3'                                        |
| <i>Ucp1</i>                          | NM_009463        | F: 5'-TACCAAGCTGTGCGATGTCCA-3'<br>R: 5'-GCACACAAACATGATGACGTTCC-3'                                   |
| <i>Pparγ</i>                         | NM_011146        | F: 5'-TGTGGGGATAAAGCATCAGG-3'<br>R: 5'-GGCAGTTAAGATCACACCTAT-3'                                      |

*Lepr*: leptin receptor; *Dock7*: dedicator of cytokinesis 7;

*Gapdh*: glyceraldehyde-3-phosphate dehydrogenase; *Agrp*: agouti related neuropeptide;

*Cart*: cocaine- and amphetamine- regulated transcript; *Npy*: neuropeptide Y;

*Pomc*: pro-opiomelanocortin; *Ucp*: uncoupling protein;

*Ppar*: peroxisome proliferator activated receptor.

F: forward primer; R: reverse primer.

*Dock7*: wild type is amplified by R1; a mutant gene (*misty*) is amplified by R2.

The two genes are amplified by the same forward primer.
